# Supplementary material for: Ordered assemblies of silver nanoparticles on carbon nitride sheets and their application in the non-enzymatic sensing of hydrogen peroxide and glucose
Source: Royal Society of Chemistry journal article supplement (doi:10.1039/c4tb01740d), 2014-12-10
Supplement: c4tb01740d1.pdf [file c4tb01740d1.pdf]

## Supporting Information

### **Ordered Assembly of Silver Nanoparticles on Carbon Nitride Sheets and their Applications in Non-enzymatic Sensing of Hydrogen Peroxide and Glucose**

Manas Kumar Kundu<sup>‡</sup>, Mriganka Sadhukhan<sup>‡</sup> and Sudip Barman\*

<sup>‡</sup> authors of equal contribution

#### **1. Experimental**

Graphitic carbon nitride quantum dots (g-CNQDs) were synthesized by MAS-II microwave synthesizer from SINEO Microwave Chemistry Technology (Shanghai, China). Ultrasound was performed by using SINEO UWave-1000 (Shanghai, China) with 28 kHz frequency. UV-Visible spectra were performed by using UV-Visible spectrophotometer of Varian Cary 100 Bio. The quenching and enhancement study was done by spectrofluorimeter from Perkin Elmer (Model is LS 55). Time Correlated Single Photon Counting (TCSPC) spectrometer from Edinburgh (OB920) was used for fluorescence lifetime measurements. FT-IR spectrum was performed by using Perkin Elmer RXI FT-IR spectrophotometer. Powder X-ray Diffraction was taken using Bruker DAVINCI D8 ADVANCE diffractometer equipped with Cu K<sub>α</sub> radiation where  $\lambda = 0.15406$  nm. XPS measurements were done using VG Microtech where monochromatic Mg K<sub>α</sub> X-ray was the source. Field-emission scanning electron microscope (FESEM) system (Carl Zeiss, Germany make, Model: Sigma) was used for taking FESEM images. Transmission electron microscopy (TEM) images were taken from TEM, FEI, Technai G2. Electrochemical measurements were performed with a conventional three electrode system, glassy carbon as a working electrode, platinum wire as a

counter electrode and Ag/AgCl as a reference electrode by using an Electrochemical Workstation (CH Instrument, Model- 1100 A).

## 2. Fluorescence life time measurement

Fluorescence life time of g-CNQDs in absence and presence of different concentration of Ag<sup>+</sup> ions were evaluated using Time Correlated Single Photon Counting technique. All the decay profiles were recorded in water solvent, 330 nm LED was used to excite the molecule and emission wavelength was kept at 400 nm. Decay curves were fitted by using the following equation:

$$I(t) = \sum_i A_i \exp(-t/\tau_i)$$

where I(t) is intensity, assumed as the sum of the individual single exponential decays, A<sub>i</sub> is the pre-exponential factor and τ<sub>i</sub> is decay time. The all the decay curves were fitted with three exponential functions. Then the average life time was calculated from the following equation

$$\tau_i = \frac{\sum_i A_i \tau_i^2}{\sum_i A_i \tau_i}$$

### 3. Fluorescence quenching measurement

$\text{Ag}^+$  quenches the fluorescence intensity of g-CNQDs in solvent of water. The quenching behavior was studied by Stern Volmer Equation<sup>1</sup>. The Stern Volmer Equation is as follows:

$$F_0/F = 1 + K_{SV} [Q]$$

Where  $F_0$  and  $F$  is the fluorescence intensity in absence and presence of quencher,  $[Q]$  is the quencher concentration.

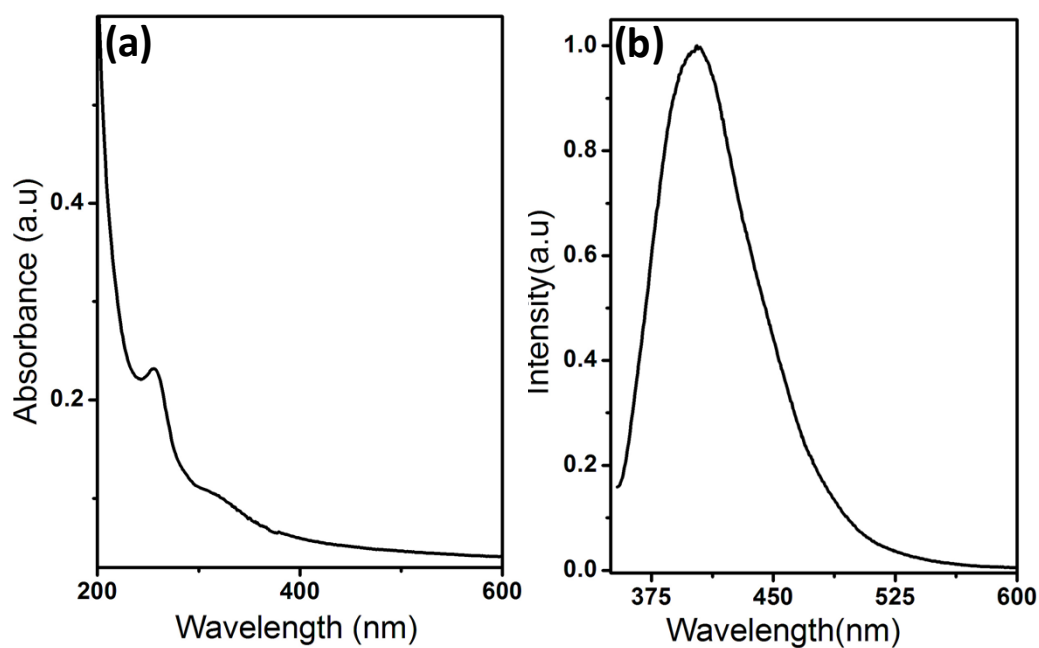

**Fig. S1.** (a) UV-Visible spectra and (b) Fluorescence spectra of g-CNQDs.

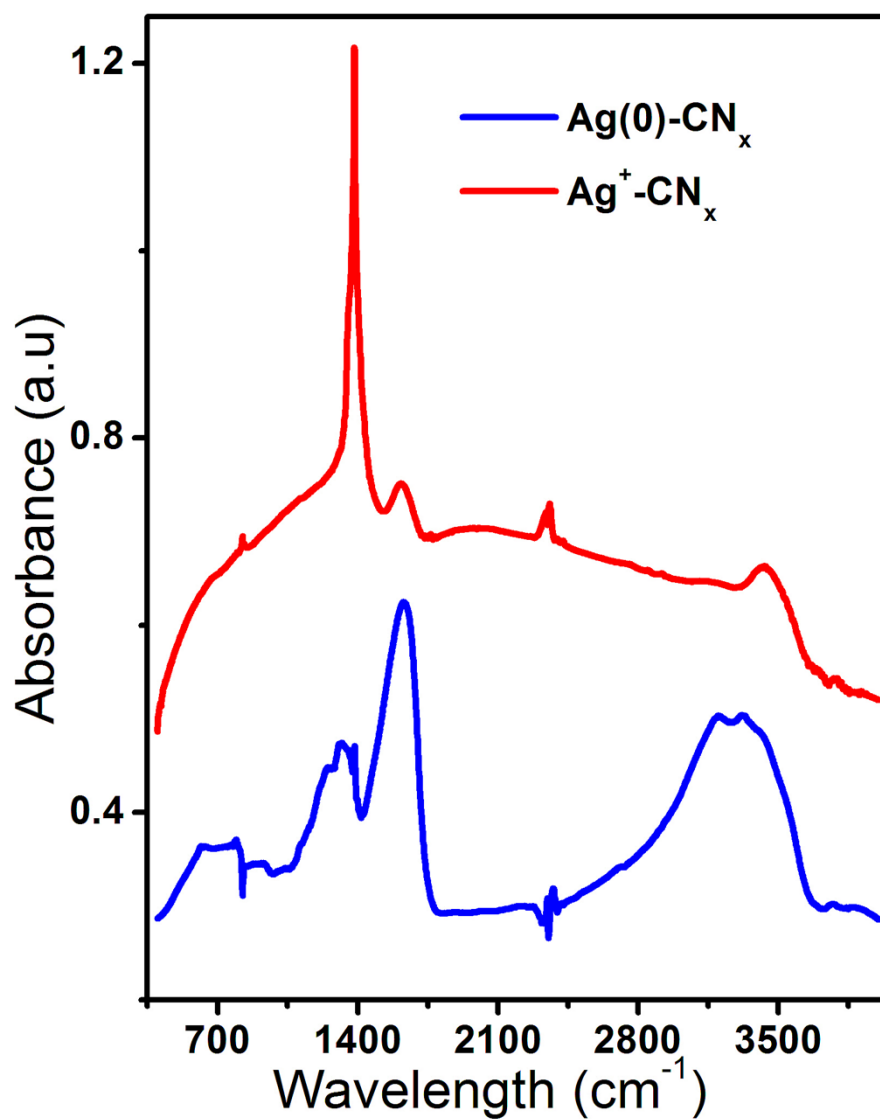

**Fig. S2.** Comparison FT-IR spectra of Ag<sup>+</sup>-CN<sub>x</sub> and Ag(0)-CN<sub>x</sub>

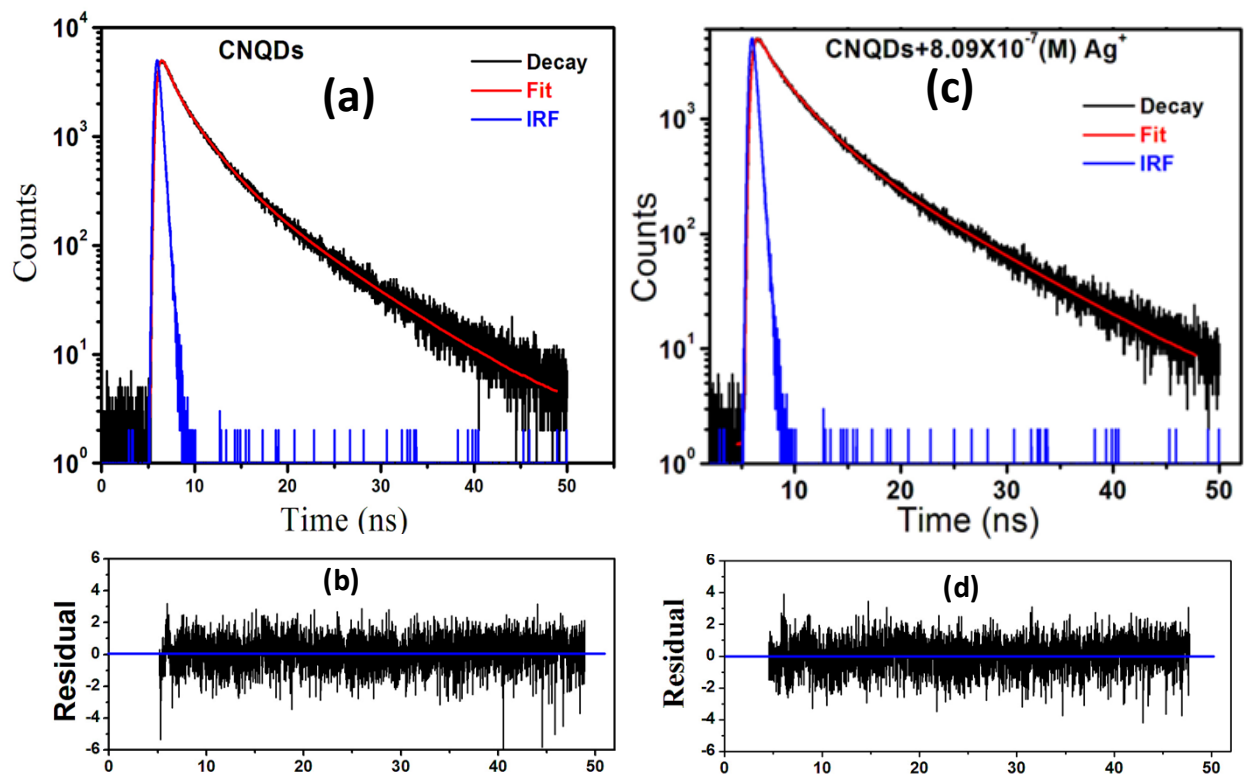

**Fig. S3** Fluorescence decay curves, exponential fitting curves and residual plots of g-CNQDs in absence of AgNO<sub>3</sub> [(a) and (b)] and in presence of AgNO<sub>3</sub> [(c) and (d)].

**Table S1.** Fluorescence decay time ( $\tau$  ns) and pre-exponential factor (A) of g-CNQDs in presence of different concentration of  $\text{Ag}^+$  ion in aqueous solution.

|                                                    | $\tau_1(A_1)$ | $\tau_2(A_2)$ | $\tau_3(A_3)$ | $\tau_{\text{avg}}$ | $\chi^2$ |
|----------------------------------------------------|---------------|---------------|---------------|---------------------|----------|
| g-CNQDs                                            | 0.6799(0.012) | 2.7490(0.011) | 7.5992(0.003) | 4.280               | 1.078    |
| g-CNQDs + $1.186 \times 10^{-7}$ (M) $\text{Ag}^+$ | 0.6009(0.011) | 2.6654(0.012) | 7.4850(0.003) | 4.215               | 1.098    |
| g-CNQDs + $2.34 \times 10^{-7}$ (M) $\text{Ag}^+$  | 0.676(0.010)  | 2.8906(0.012) | 7.8634(0.003) | 4.464               | 1.070    |
| g-CNQDs + $4.58 \times 10^{-7}$ (M) $\text{Ag}^+$  | 0.5643(0.010) | 2.8836(0.012) | 7.9503(0.003) | 4.565               | 1.122    |
| g-CNQDs + $8.09 \times 10^{-7}$ (M) $\text{Ag}^+$  | 0.5139(0.010) | 2.8901(0.012) | 8.2359(0.003) | 4.748               | 1.036    |

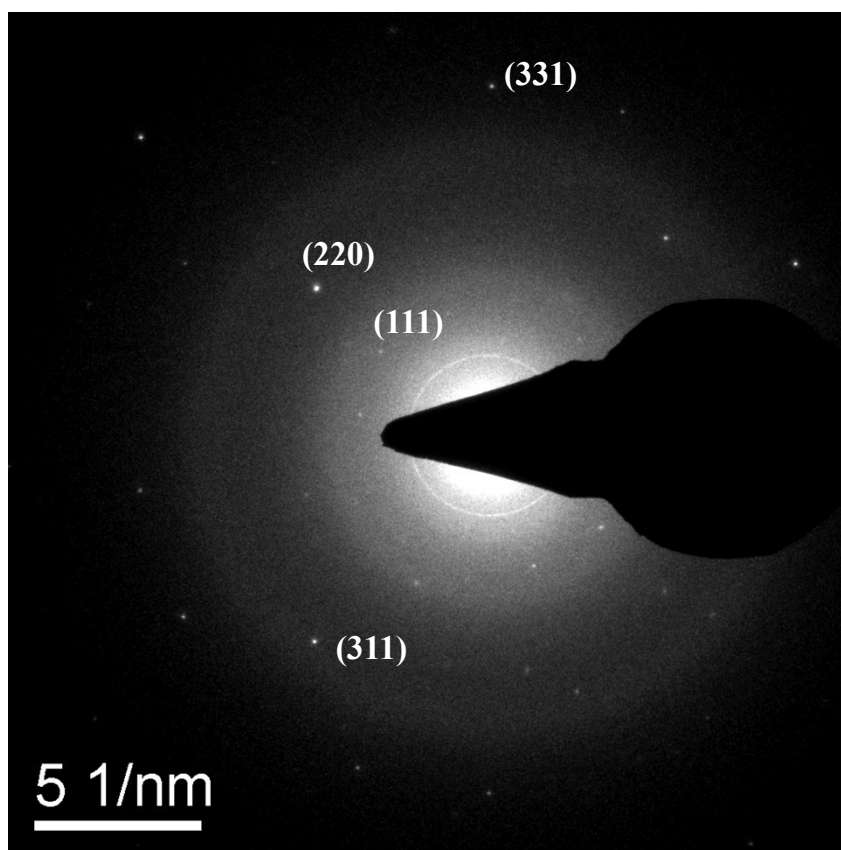

**Fig. S4** SAED image of AgNPs taken from Fig. 5(b).

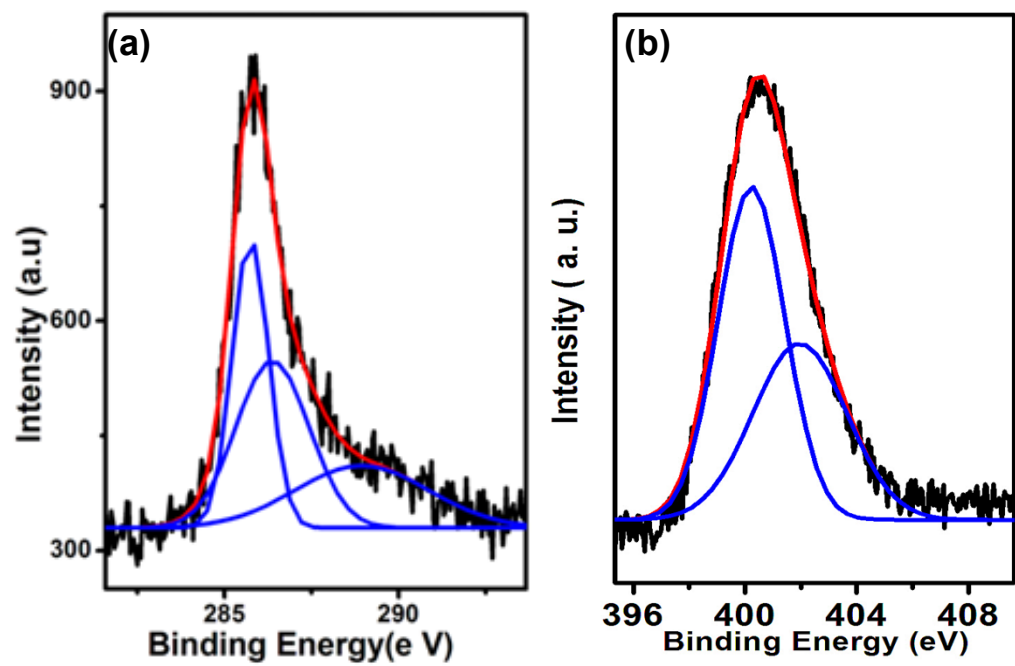

Fig. S5 (a) C1s and (b) N1s XPS spectra of  $CN_x$ .

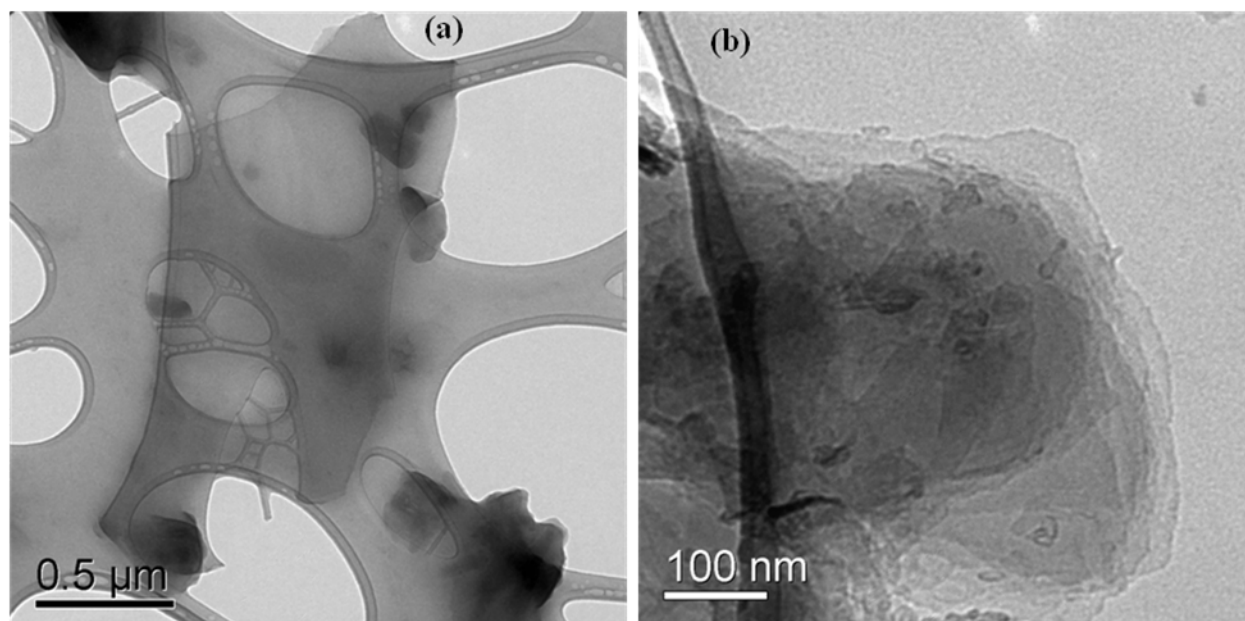

Fig. S6 (a, b) TEM images of  $CN_x$  sheets prepared from g-CNQDs.

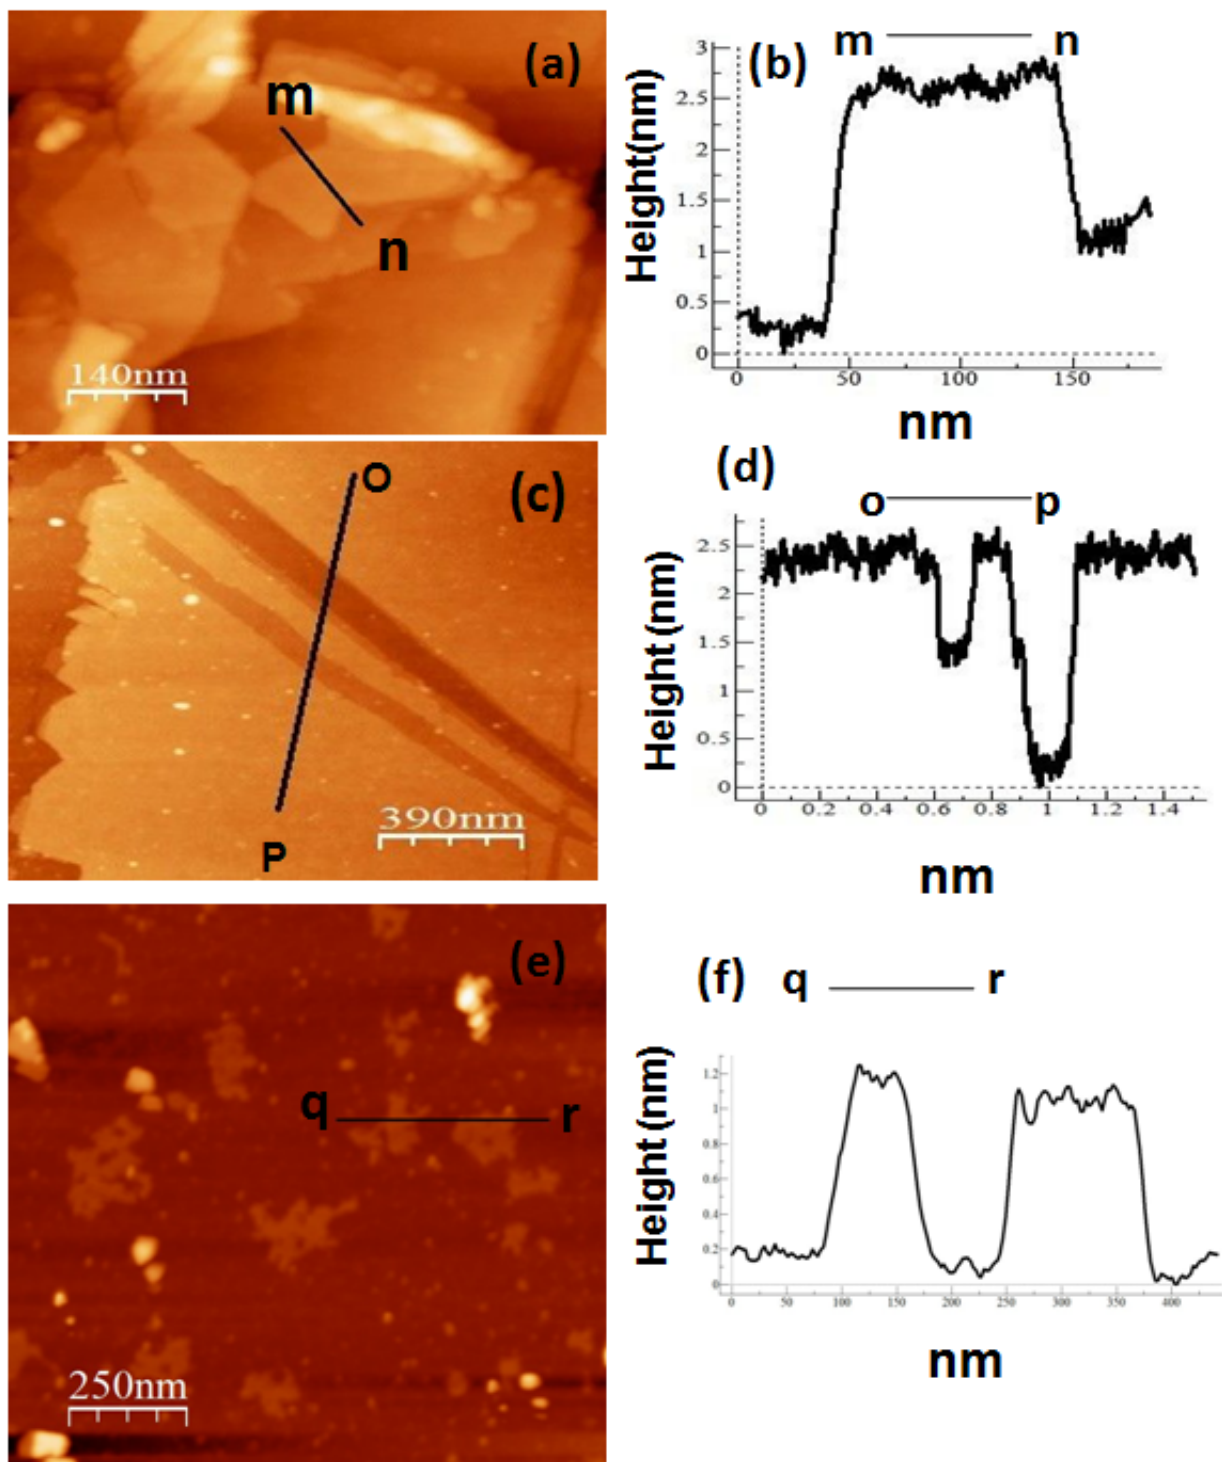

**Fig. S7** (a, c, e) AFM images of thin  $\text{CN}_x$  sheets and (b, d, f) the line profile along the line m-n, o-p and q-r from the image (a), (c) and (e) respectively. The  $\text{CN}_x$  sheets with thickness from 1nm to 3nm are formed on evaporation of different concentration of g-CNQDs solutions.



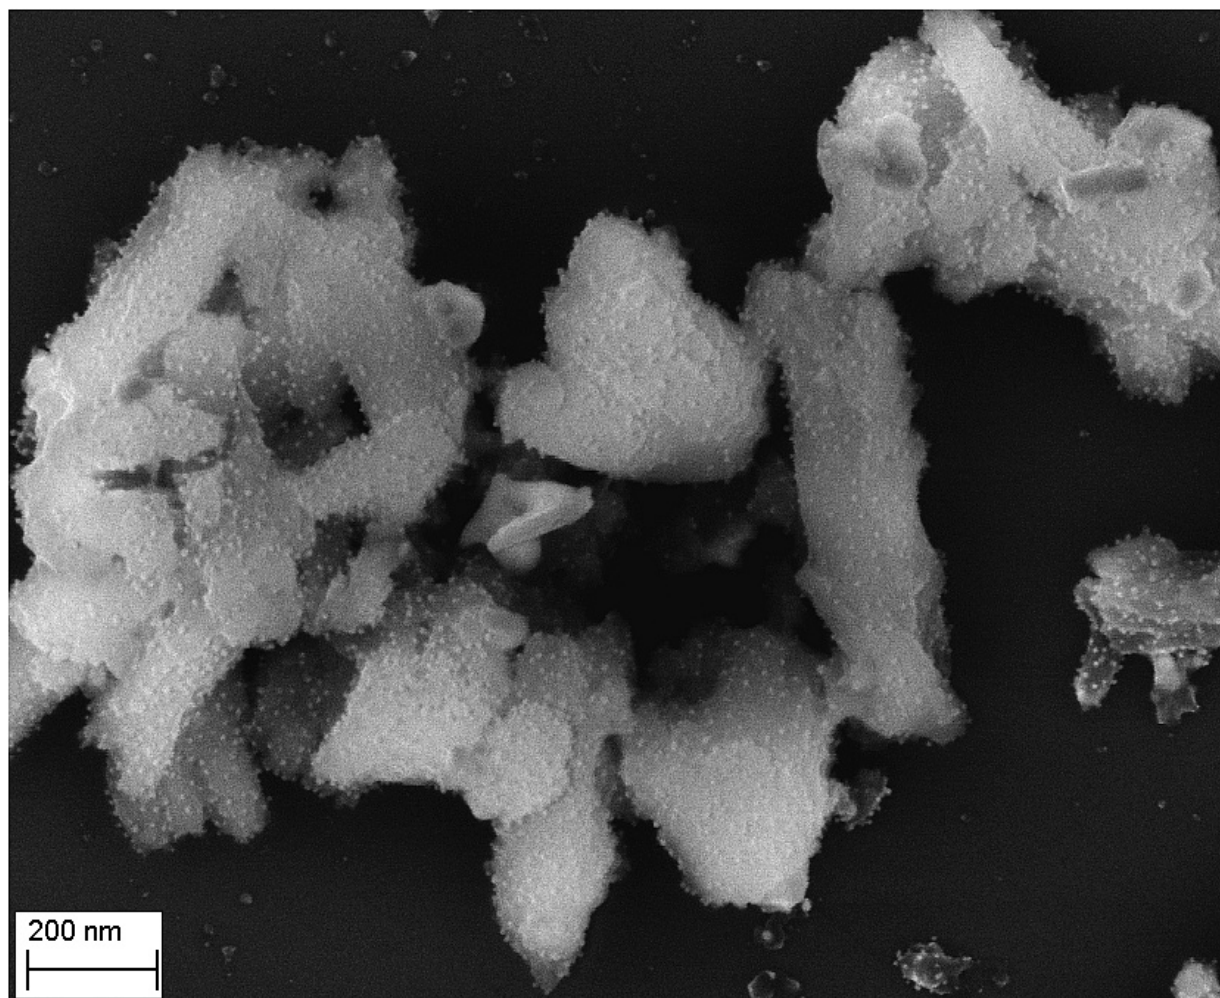

**Fig. S8** SEM image of AgNPs assembly on CN<sub>x</sub> sheet.

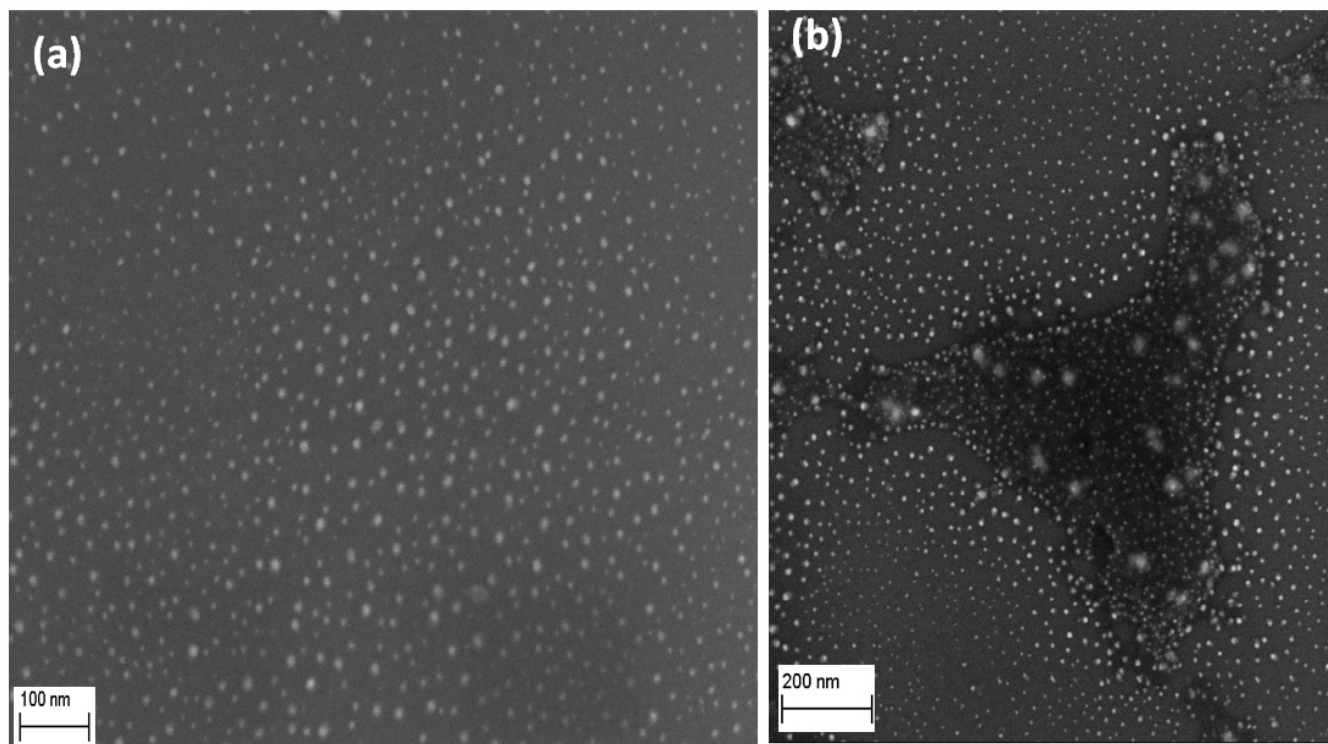

**Fig. S9** (a) and (b) SEM images showing ordered assembly of AgNPs on thin CN<sub>x</sub> sheets.

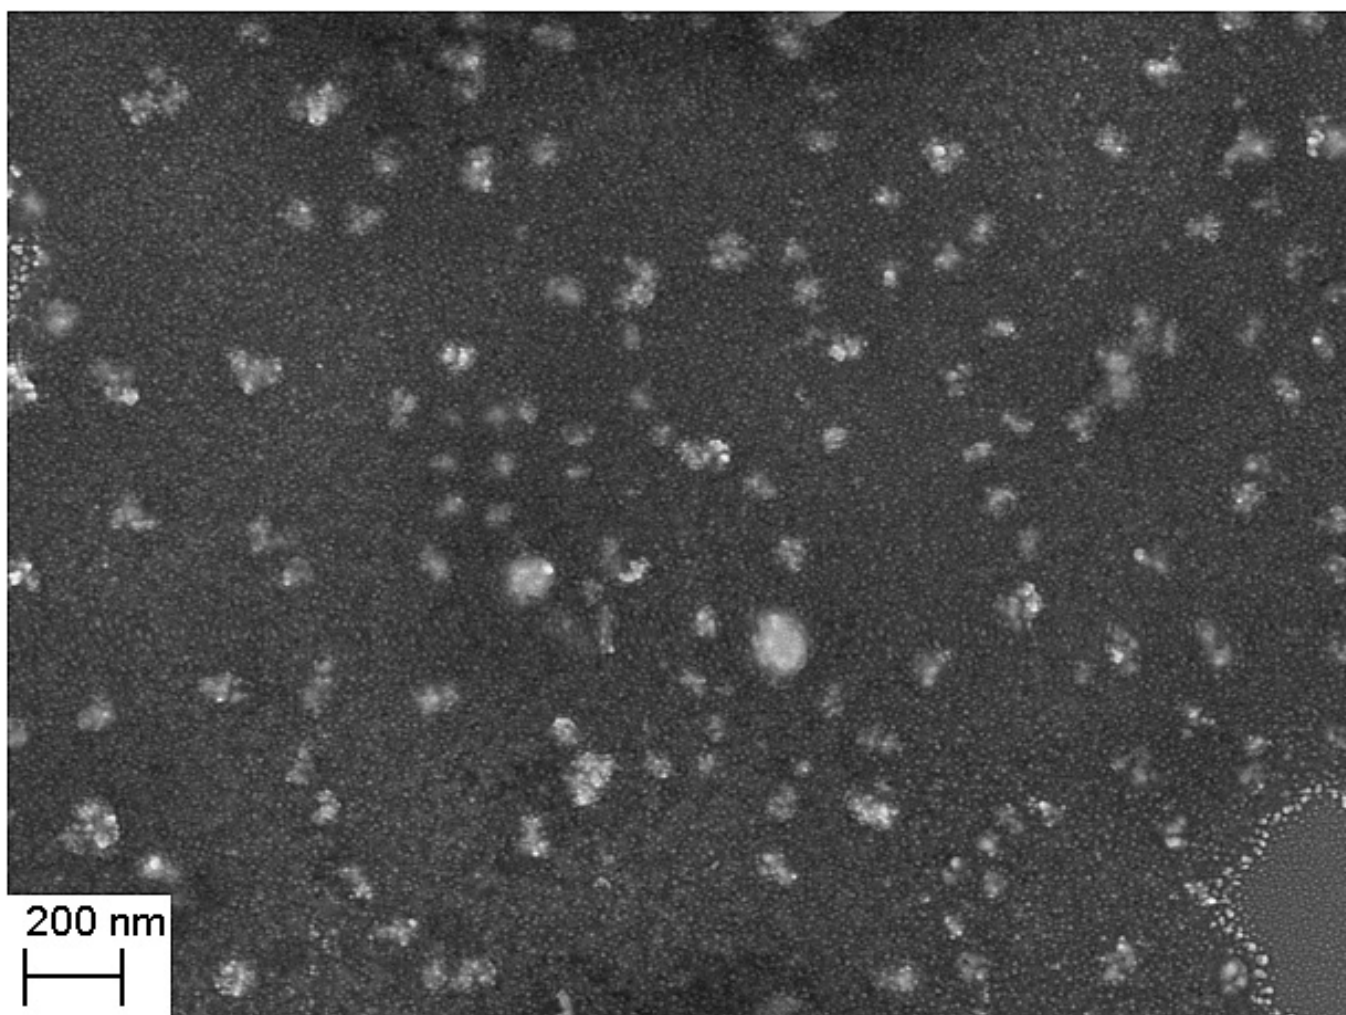

**Fig. S10** SEM image of highly ordered 2D assembly AgNPs on CN<sub>x</sub> sheet.

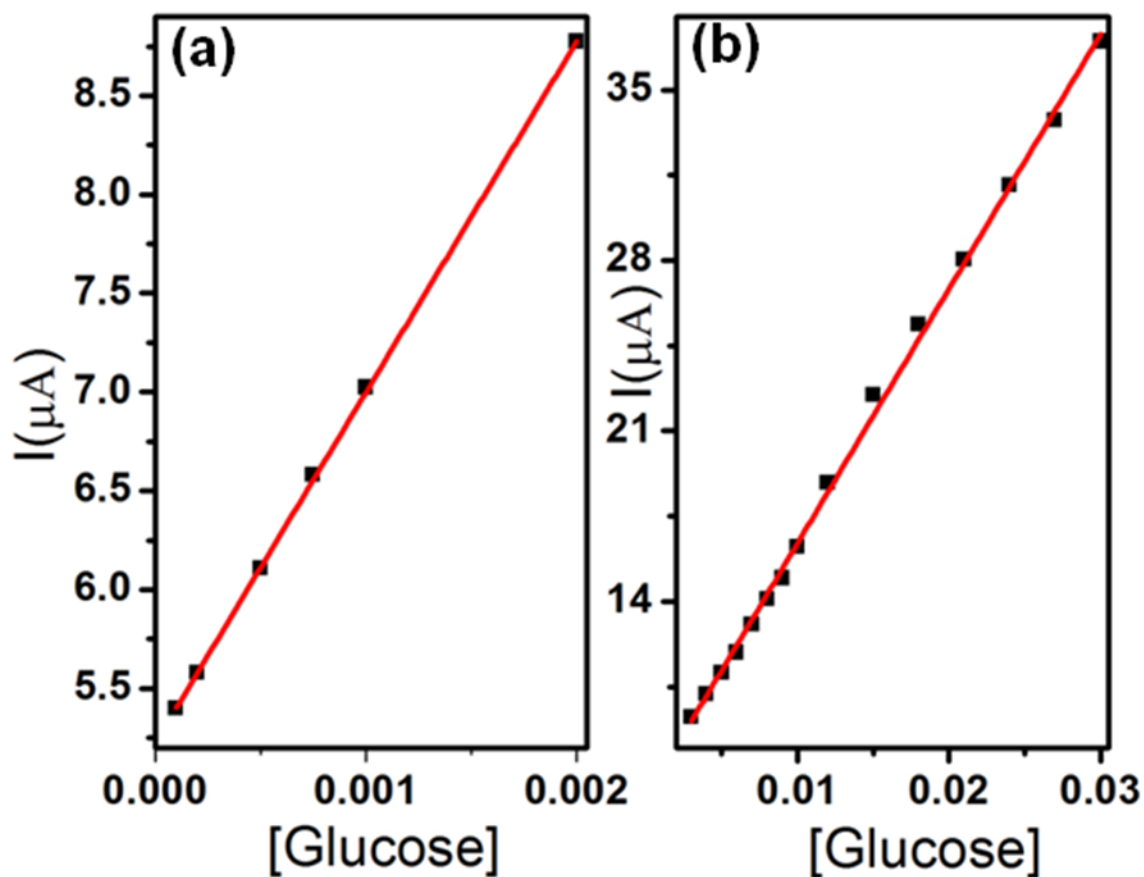

**Fig. S11** (a) Calibration curve of current vs. glucose concentration (100  $\mu\text{M}$  - 2 mM) (b) Calibration curve of current vs. glucose concentration (2 mM - 30 mM).

## References

1. J. R. Lakowicz, *Principle of Fluorescence Spectroscopy* 1999, Third Edition.
